# Supplementary material for: A self-assembled graphene/polyurethane sponge for excellent electromagnetic interference shielding performance
Source: Royal Society of Chemistry journal article supplement (doi:10.1039/c9ra02059d), 2019-01-01

## Supporting Information

# A self-assembled graphene/polyurethane foam for excellent performance of Electromagnetic Interference shielding

Figure S1: TGA of PUG sponge.

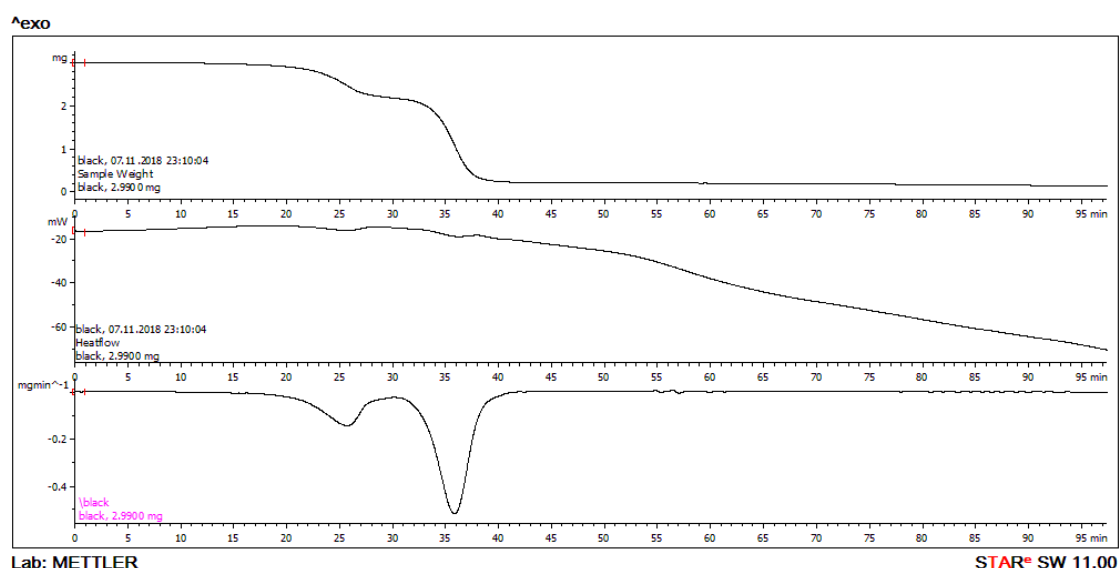

Figure S2:  
TGA of PU sponge

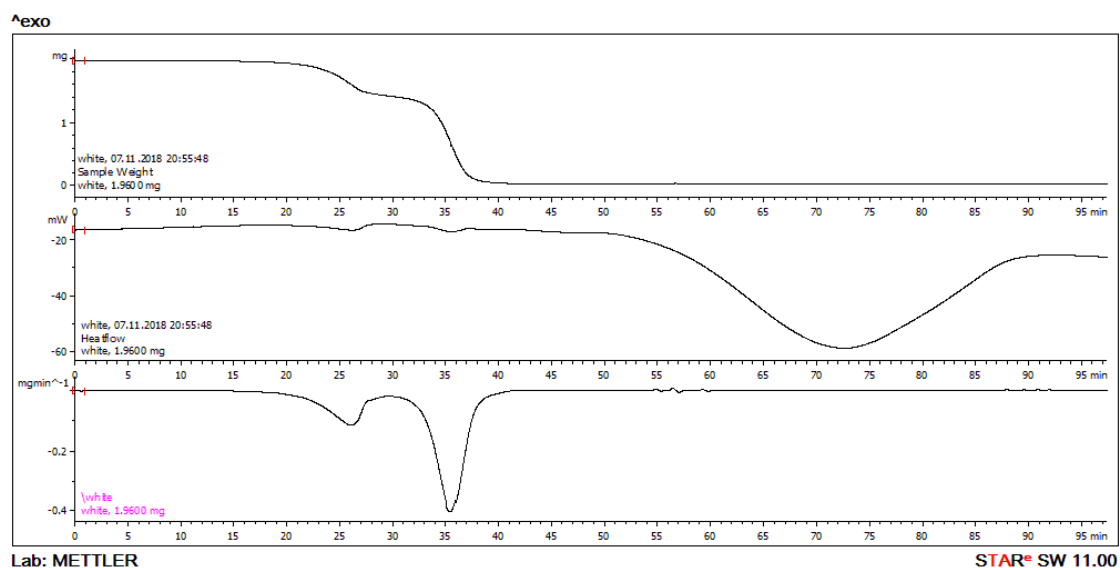

Figure S3: The test of electroconductivity of the PUG sponge in three different direction

The primary electroconductivity is  $\sigma = \frac{L}{R.S} = 1.01 \times 10^{-4} \text{ S/m}$

Height:

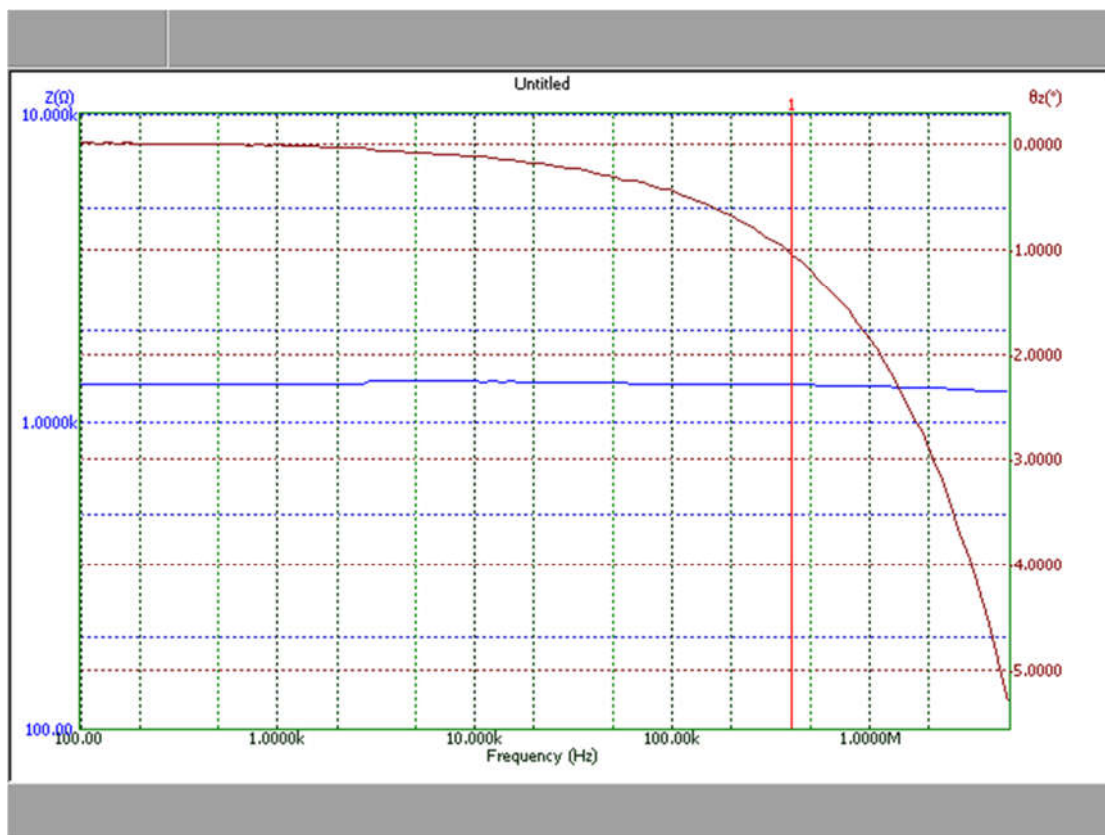

Length:

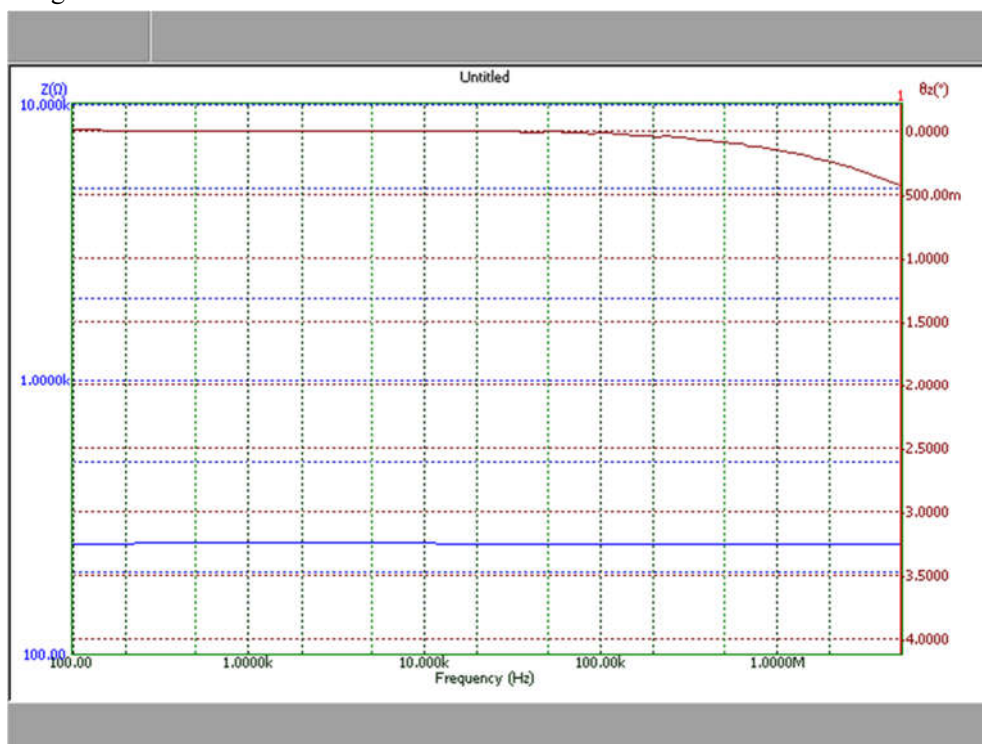

Width:

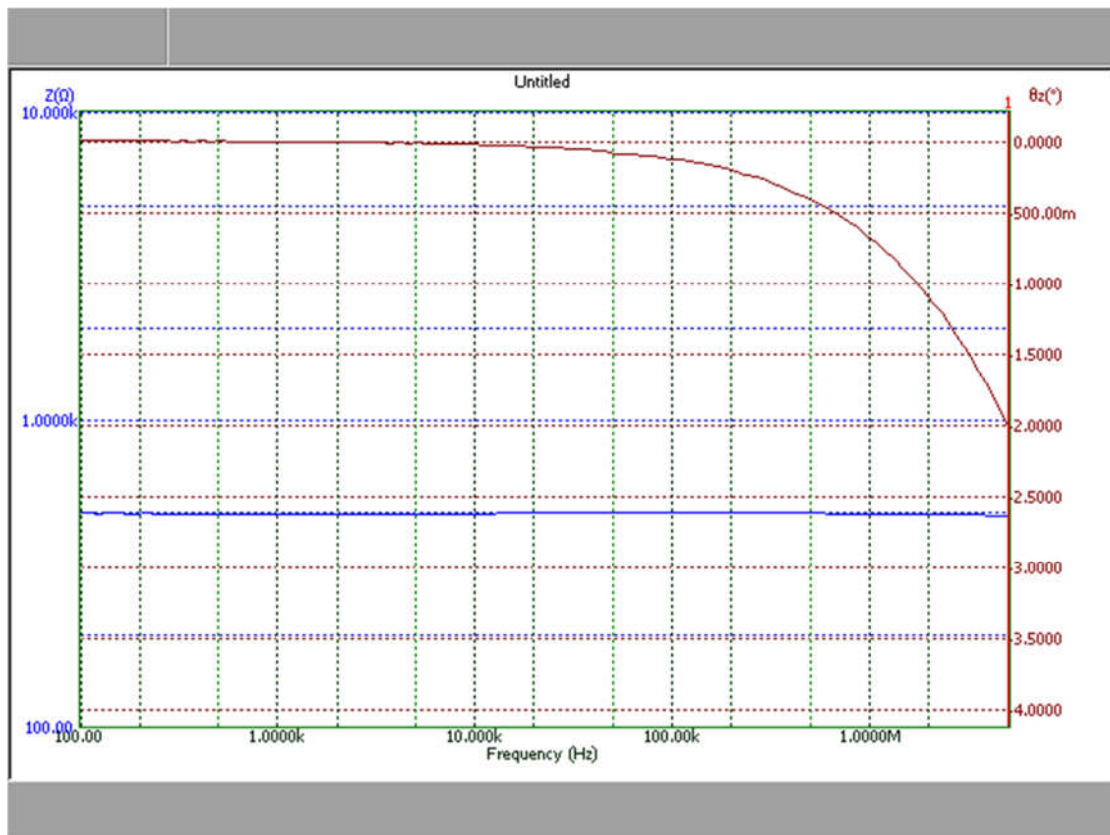

Figure S4:

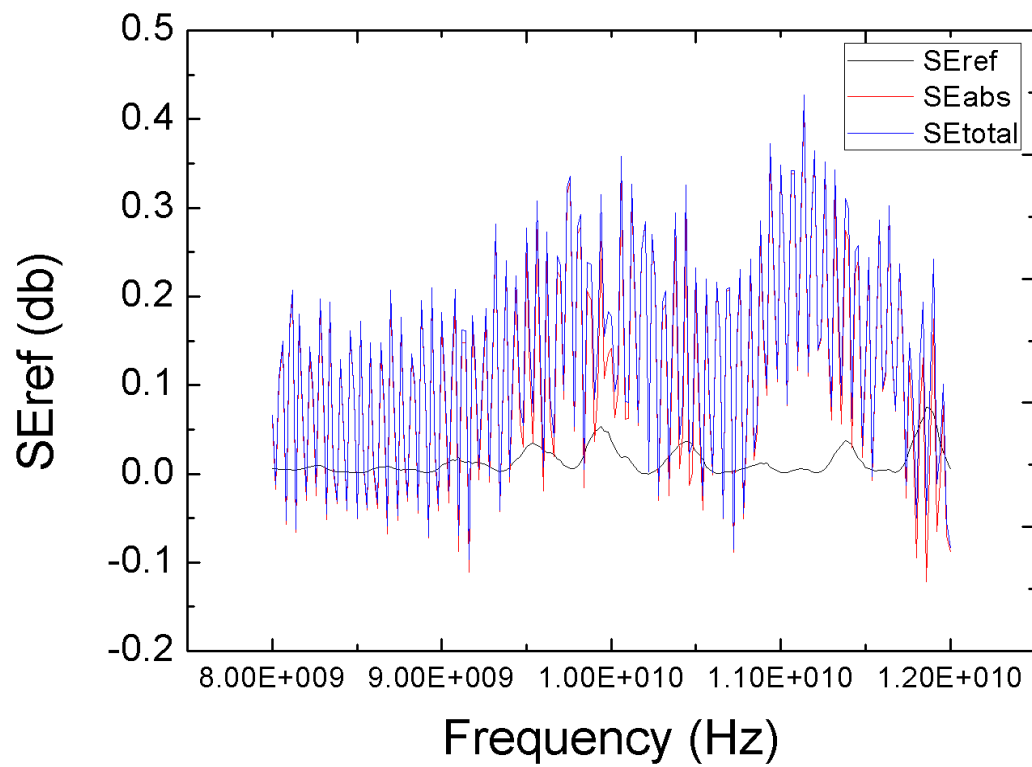

Extra information:

Figure 1: XPS analysis of PUG sponge:

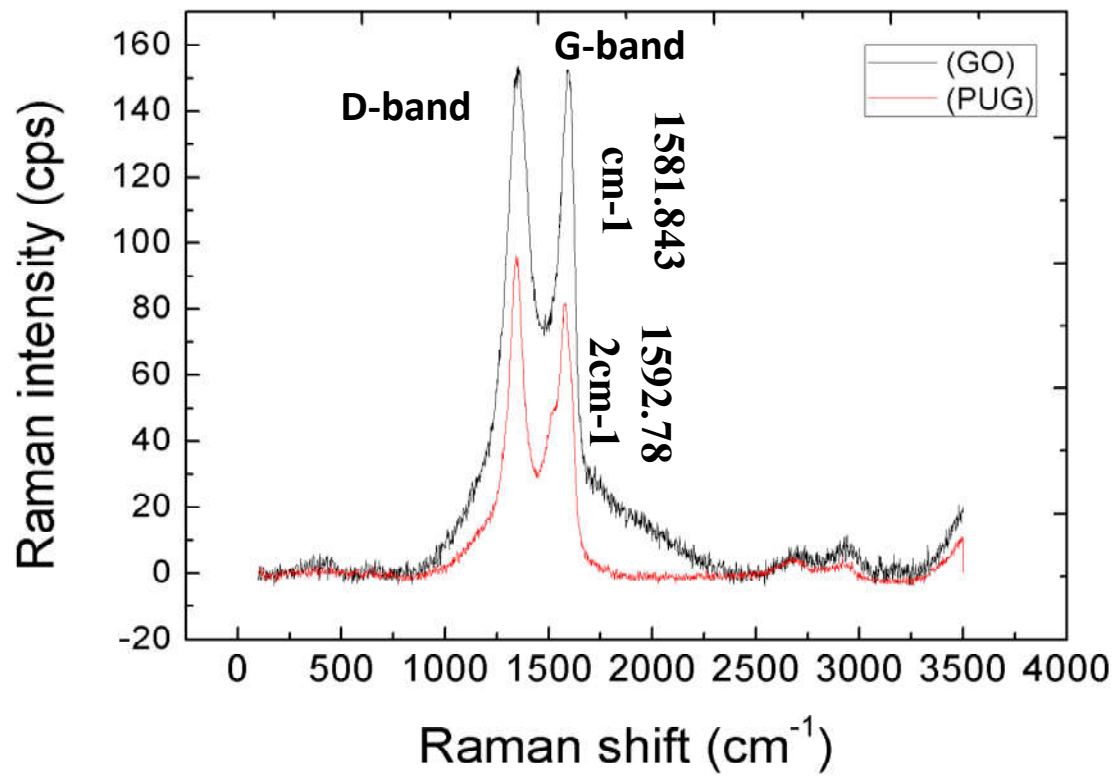

Figure 2: Other SEM of the PUG sponge

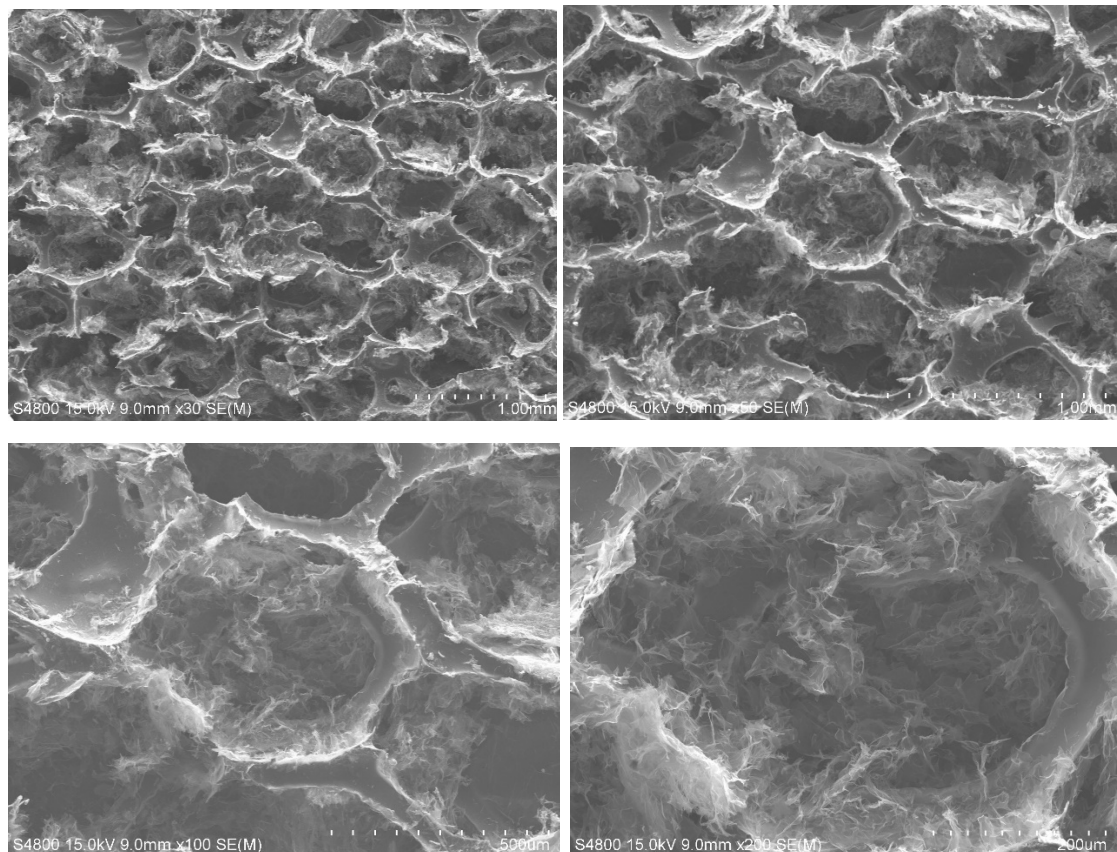

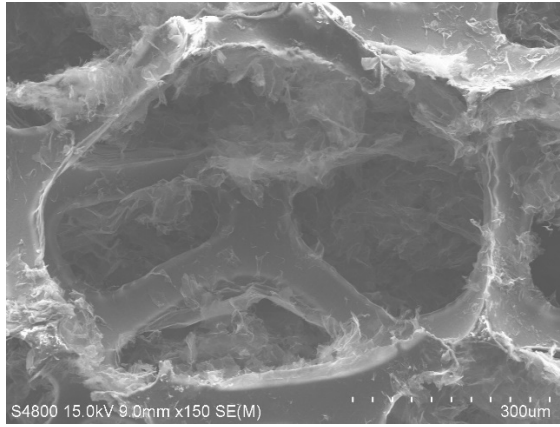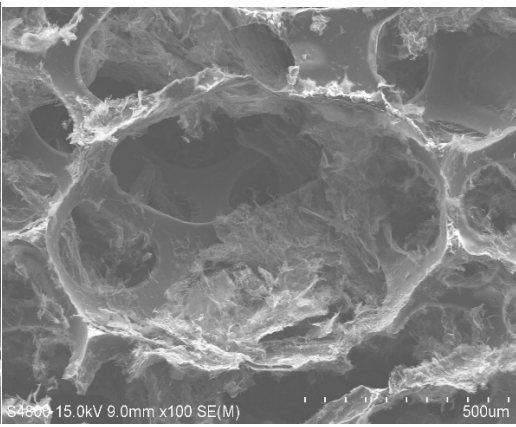

Supplement: c9ra02059d1.pdf [file c9ra02059d1.pdf]
